# Supplementary material for: Improved catalytic activity in methanol electro-oxidation over the nickel form of aluminum-rich beta-SDS zeolite modified electrode
Source: Royal Society of Chemistry journal article supplement (doi:10.1039/c4ta06699e), 2015-01-01
Supplement: c4ta06699e1.pdf [file c4ta06699e1.pdf]

# Improved catalytic activity in methanol electro-oxidation over nickel form of aluminum-rich Beta-SDS zeolite modified electrode

Yanmei Liao<sup>a</sup>, Shuxiang Pan<sup>b</sup>, Chaoqun Bian<sup>b</sup>, Xiangju Meng<sup>b</sup>, and Feng-Shou Xiao<sup>b\*</sup>

<sup>a</sup> *State Key Laboratory of Inorganic Synthesis and Preparative Chemistry, Jilin University, Changchun, 130012, China*

<sup>b</sup> *Key Lab of Applied Chemistry of Zhejiang Province and Department of Chemistry (Xixi Campus), Zhejiang University, Hangzhou, 310028, China*

E-mail: fsxiao@zju.edu.cn

## Experimental

**Characterization.** X-ray diffraction (XRD) patterns were measured with a Rigaku Ultimate IV diffractometer using Cu  $K\alpha$  radiation. Scanning electron microscopy (SEM) images of the samples were performed on a Hitachi SU 1510 apparatus. Nitrogen sorption isotherms at -196 °C were obtained with a Micromeritics ASAP 2020M system. The Si/Al ratios of the samples and loading of Ni<sup>2+</sup> were measured by inductively coupled plasma (ICP) with a Perkin-Elmer optima 8000 emission spectrometer.

**Electrochemical Measurements:** The electrochemical tests were performed using the electrochemical workstation CHI660D (Shanghai Chenhua Instrument Co., Ltd., China). A three compartment electrochemical cell was employed using Hg/HgO as

---

the reference electrode, a platinum foil as the auxiliary electrode, and zeolite modified glass carbon electrode as the working electrode.

**Table S1.** Beta-SDS zeolites with various loadings of Ni<sup>2+</sup> species in the as-synthesized samples

| Sample          | Si/Al | Ni <sup>2+</sup> (wt.%) |
|-----------------|-------|-------------------------|
| Ni-Beta-SDS-0.9 | 4.5   | 0.9                     |
| Ni-Beta-SDS-2.1 | 4.9   | 2.1                     |
| Ni-Beta-SDS-4.2 | 5.0   | 4.2                     |
| Ni-Beta-SDS-5.1 | 5.0   | 5.1                     |
| Ni-Beta-SDS-6.6 | 5.0   | 6.6                     |
| Ni-Beta-SDS-7.0 | 5.0   | 7.0                     |

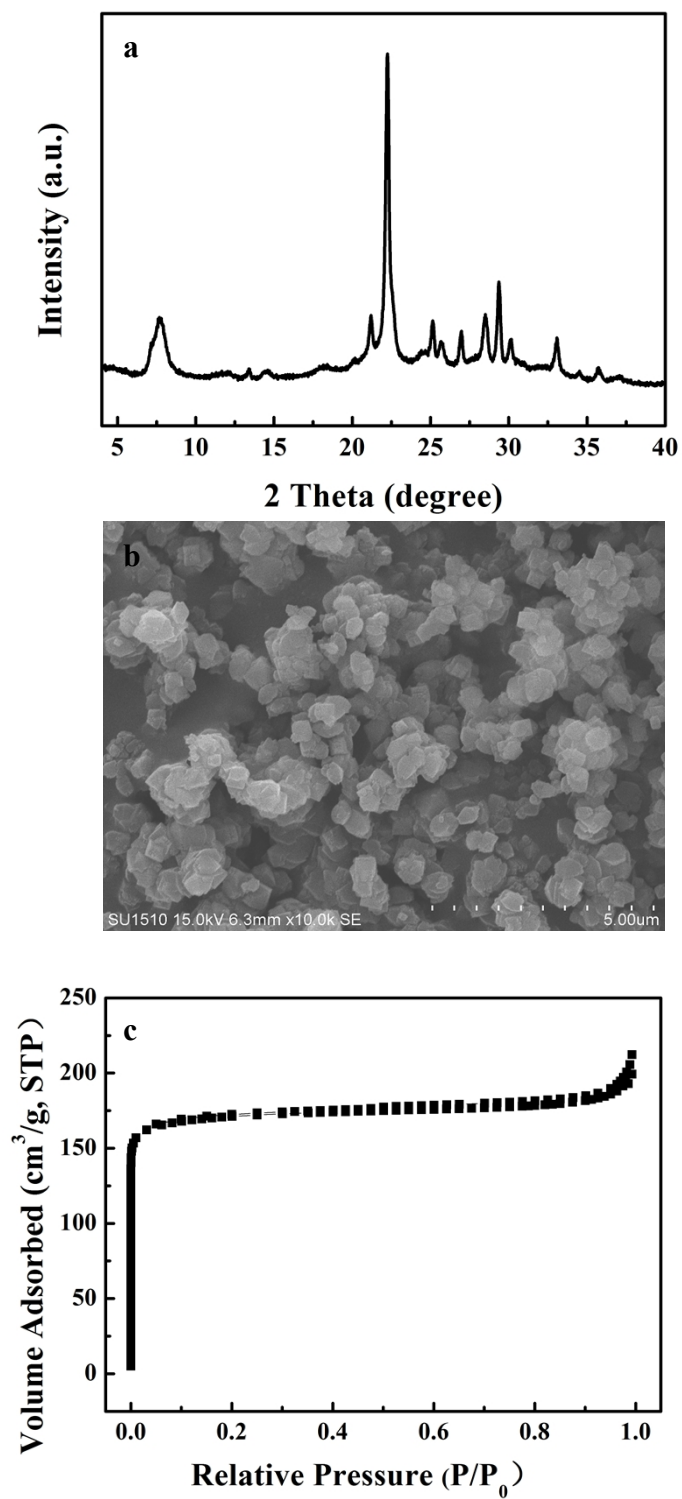

**Figure S1.** (a) XRD pattern, (b) SEM image and (c) nitrogen sorption isotherms of Beta-SDS sample.

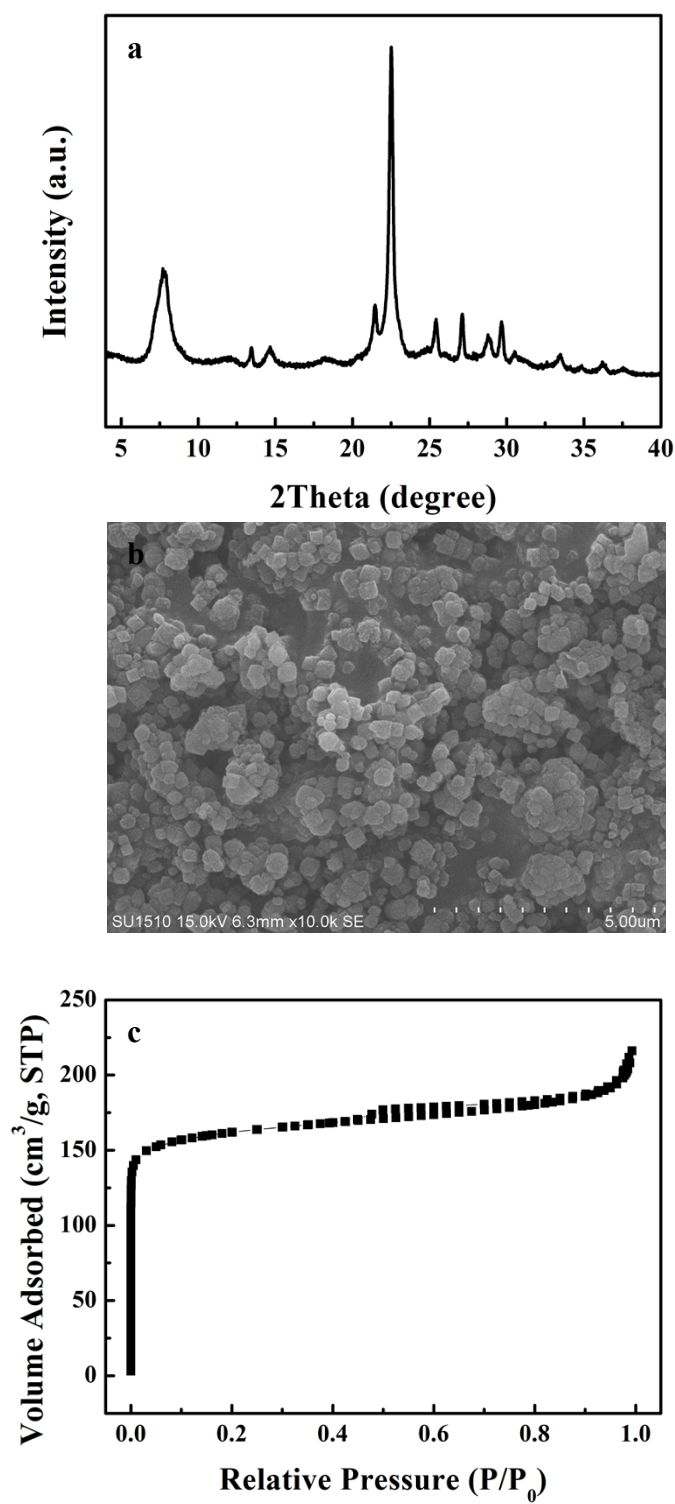

**Figure S2.** (a) XRD pattern, (b) SEM image and (c) nitrogen sorption isotherms of Beta-TEA sample.

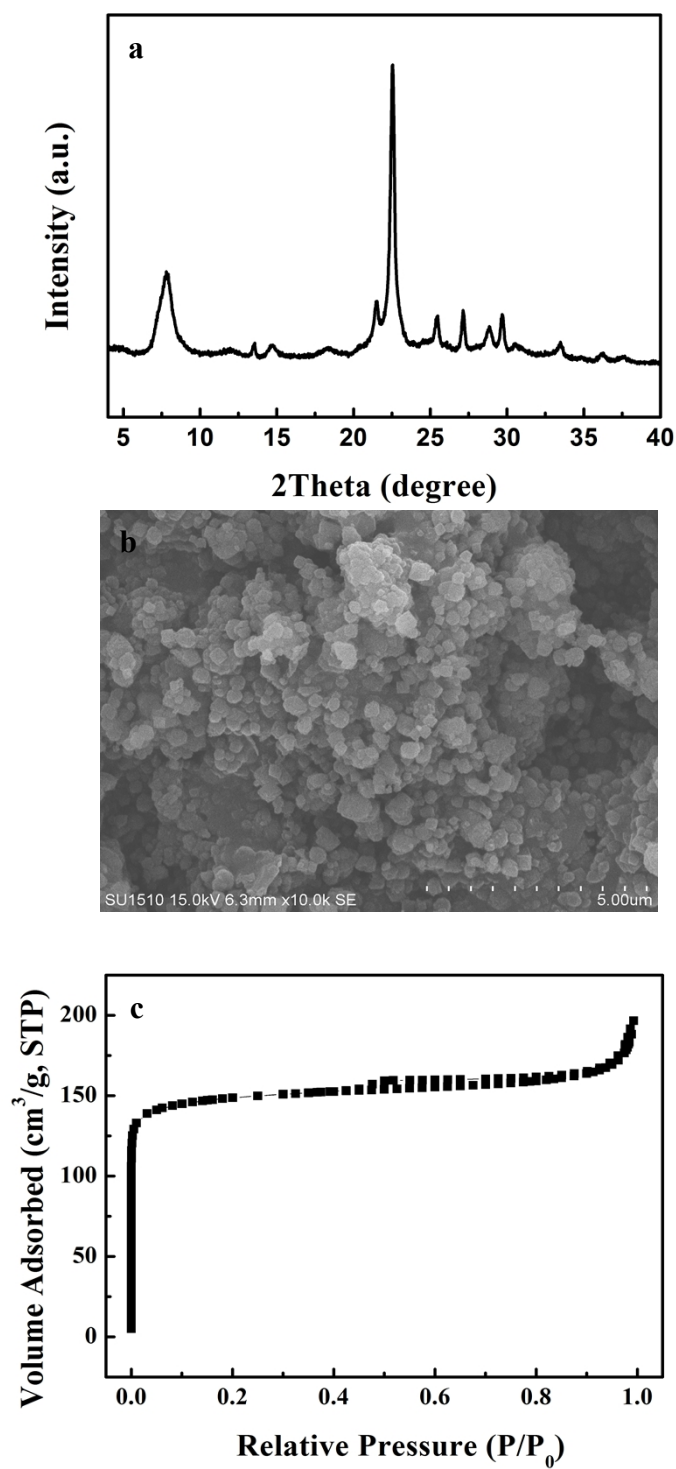

**Figure S3.** (a) XRD pattern, (b) SEM image and (c) nitrogen sorption isotherms of Ni-Beta-TEA sample.

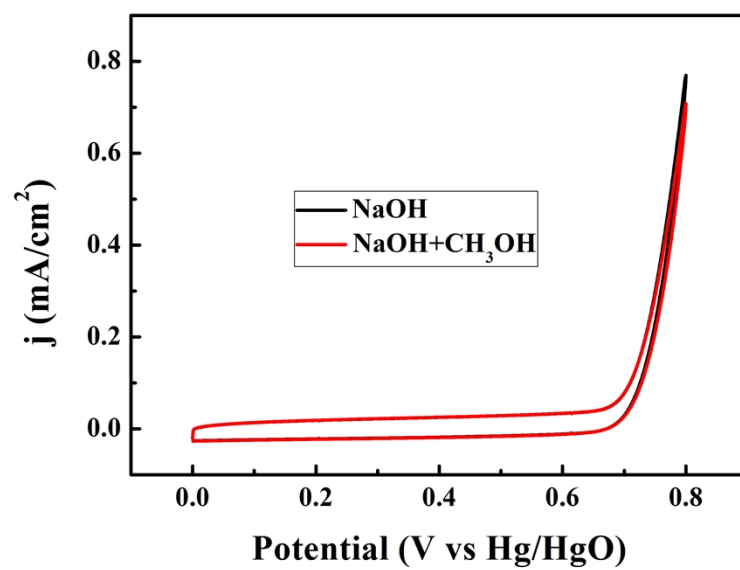

**Figure S4.** Cyclic voltammograms of Beta-TEA zeolite modified electrode in 0.1 M NaOH and in a mixture of 0.1 M NaOH with 0.1 M CH<sub>3</sub>OH at scan rate of 50 mV/s.

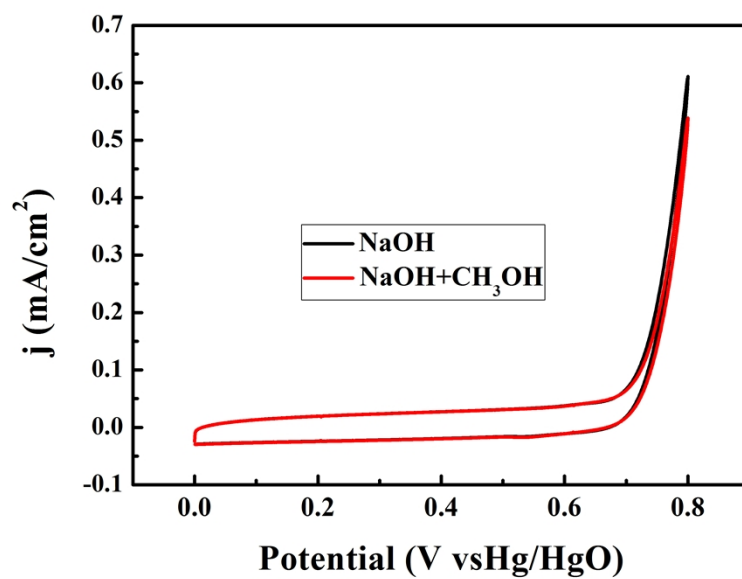

**Figure S5.** Cyclic voltammograms of Beta-SDS zeolite modified electrode in 0.1 M NaOH and in a mixture of 0.1 M NaOH and 0.1 M CH<sub>3</sub>OH at scan rate of 50 mV/s.



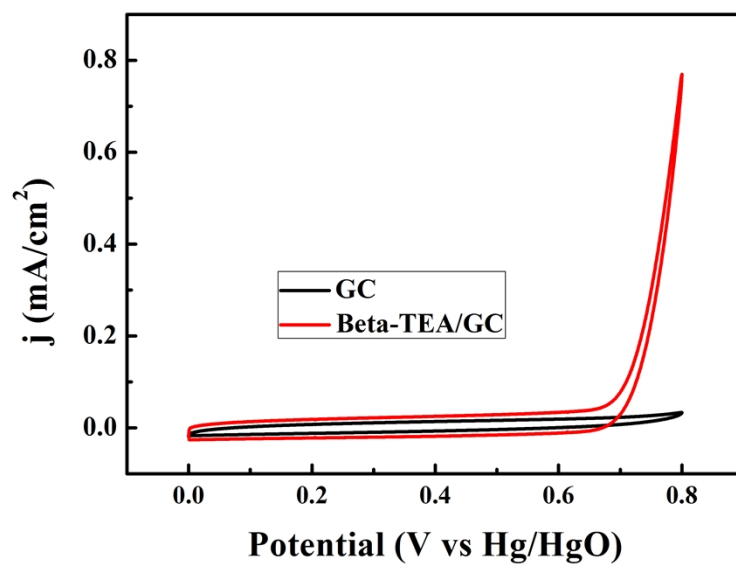

**Figure S6.** Cyclic voltammograms of glass carbon electrode (GC, black line) and Beta-TEA zeolite modified electrode (red line) in 0.1 M NaOH at scan rate of 50 mV/s.

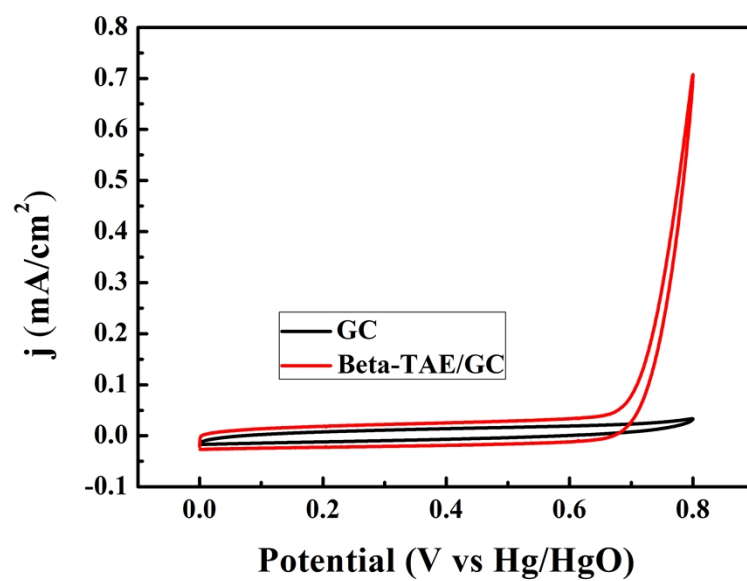

**Figure S7.** Cyclic voltammograms of glass carbon electrode (GC, black line) and Beta-TEA zeolite modified electrode (red line) in a mixture of 0.1 M NaOH and 0.1 M CH<sub>3</sub>OH at scan rate of 50 mV/s.

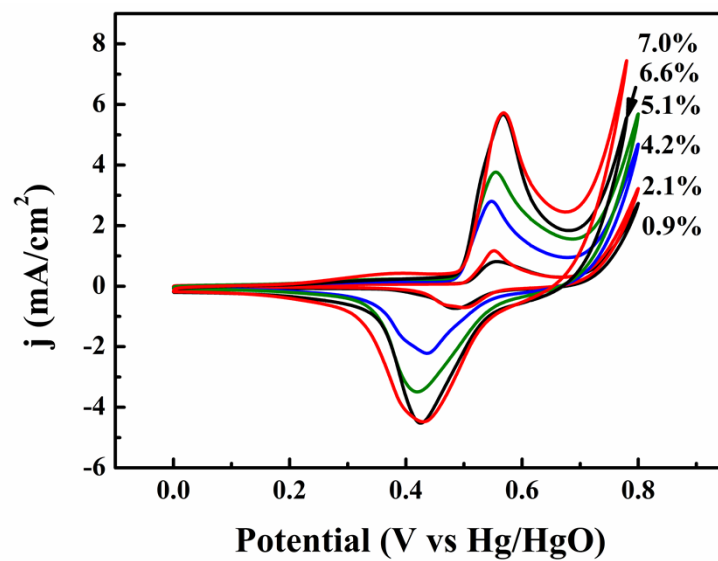

**Figure S8.** Cyclic voltammograms of Ni-Beta-SDS/GC electrocatalysts with various loadings of Ni<sup>2+</sup> species in 0.1 M NaOH at scan rate of 50 mV/s.

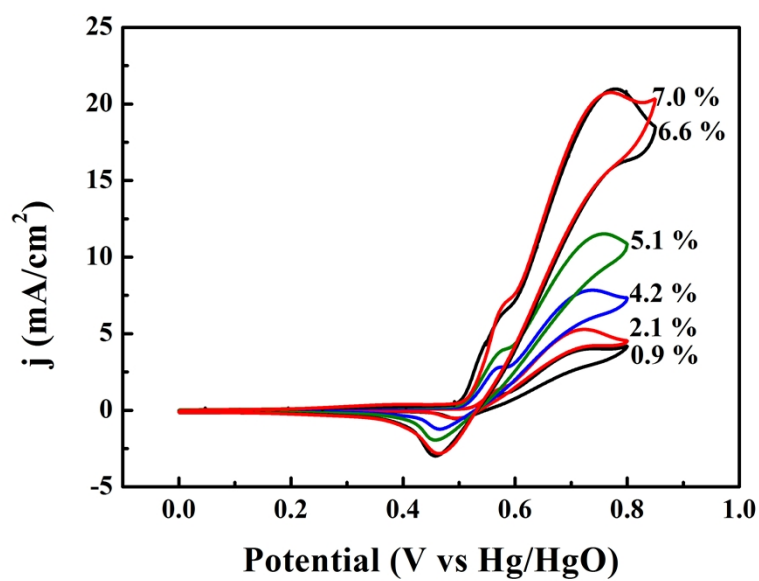

**Figure S9.** Cyclic voltammograms of Ni-Beta-SDS/GC electrocatalysts with various loadings of Ni<sup>2+</sup> species in a mixture of 0.1 M NaOH and 0.1 M CH<sub>3</sub>OH at scan rate of 50 mV/s.

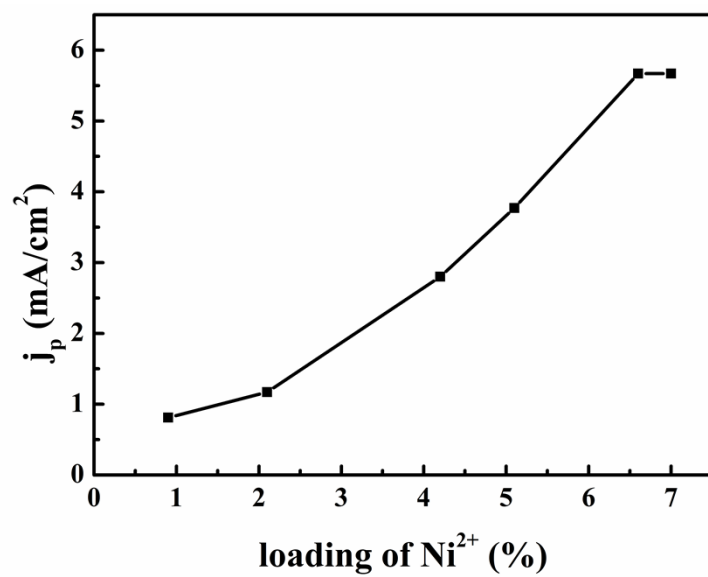

**Figure S10.** Dependence of current density in the oxidation peak on loading of  $\text{Ni}^{2+}$  species in the Ni-Beta-SDS/GC electrocatalysts in 0.1 M NaOH solution.

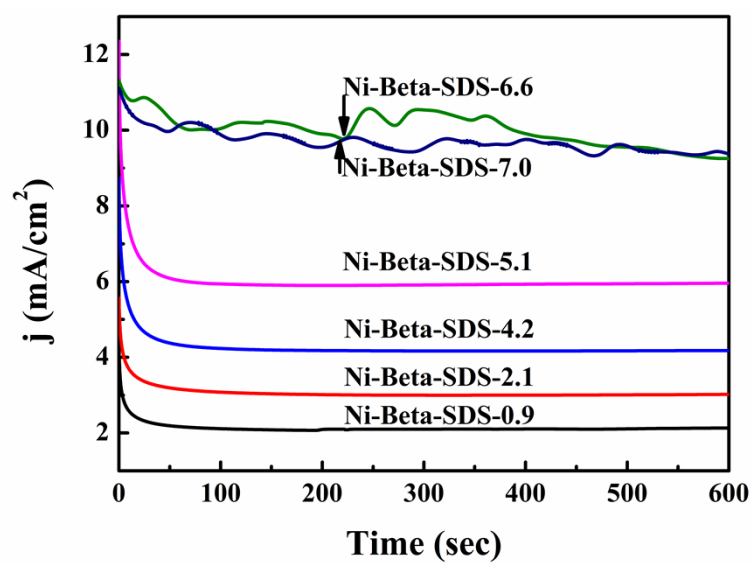

**Figure S11.** Chronoamperograms in methanol oxidation over Ni-Beta-SDS/GC electrocatalysts with various loadings of  $\text{Ni}^{2+}$  species in a mixture of 0.1 M NaOH and 0.1 M  $\text{CH}_3\text{OH}$  solutions at a potential step value of 0.7 V for 600 s.

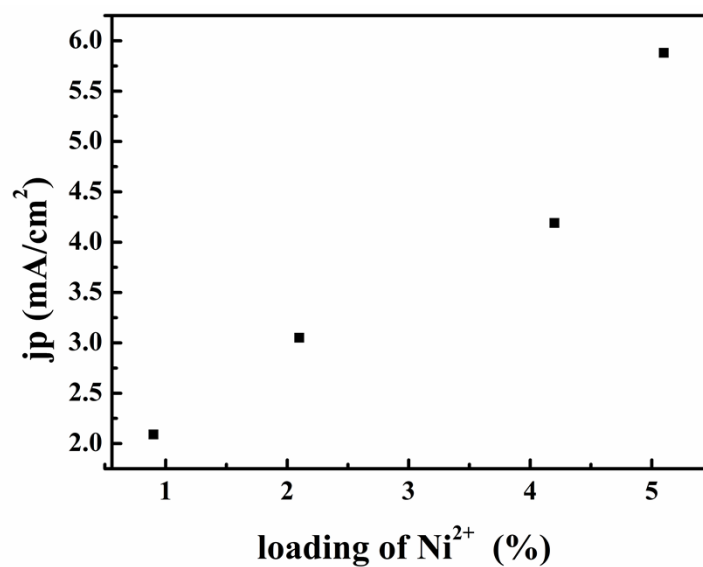

**Figure S12.** The stable current density in methanol oxidation over Ni-Beta-SDS/GC electrocatalysts with various loadings of  $\text{Ni}^{2+}$  species in a mixture of 0.1 M NaOH and 0.1 M  $\text{CH}_3\text{OH}$  solutions at a potential step value of 0.7 V for 600 s.

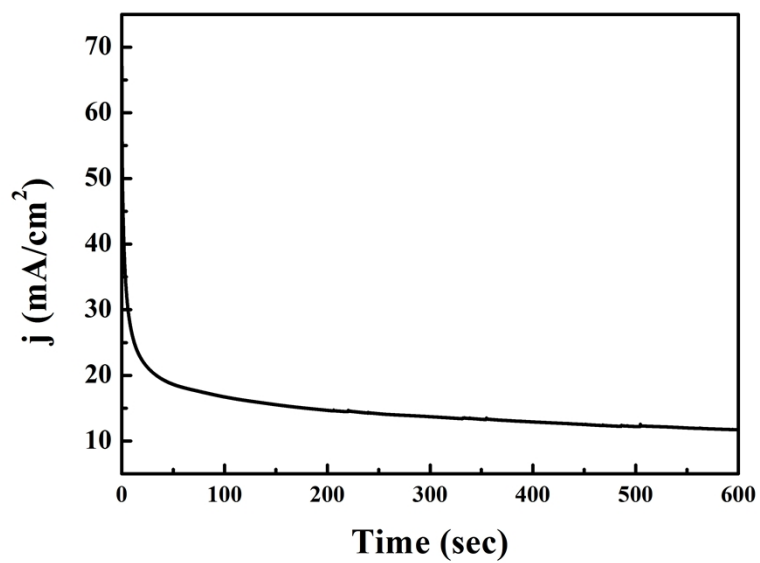

**Figure S13.** Chroanoamperogram in methanol oxidation over Pt/C electrode at 0.7 V in a mixture of 0.1 M NaOH and 0.1 M CH<sub>3</sub>OH solution.



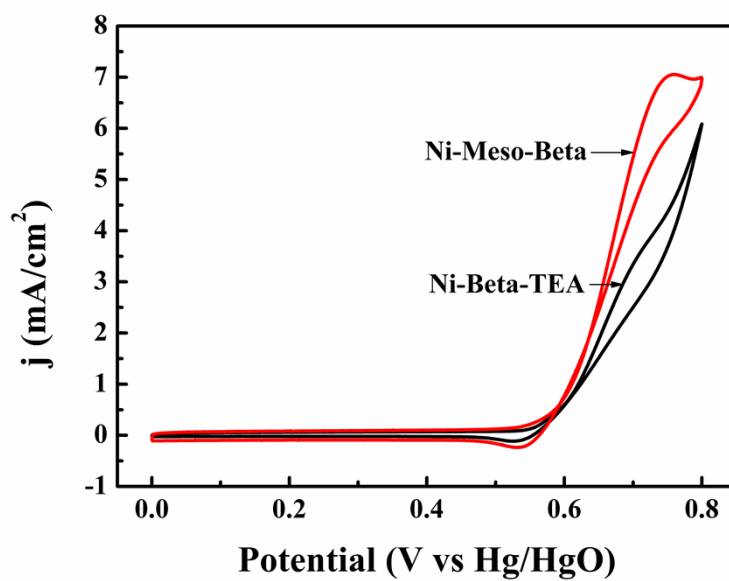

**Figure S14.** Cyclic voltammograms of Ni-Meso-Beta/GC (red line) and Ni-Beta-TEA (black line) electrocatalysts in the mixture of 0.1 M CH<sub>3</sub>OH and 0.1 M NaOH at scan rate of 50 mV/s.
